# Supplementary material for: Alyssin and Iberin in Cruciferous Vegetables Exert Anticancer Activity in HepG2 by Increasing Intracellular Reactive Oxygen Species and Tubulin Depolymerization
Source: PubMed Central journal article supplement — Biomol Ther (Seoul). 2019 Aug 13;27(6):540–52. doi: 10.4062/biomolther.2019.027 (PMC6824623; doi:10.4062/biomolther.2019.027), 2019-08-13
Supplement: bt-27-540_suppl.pdf [file bt-27-540_suppl.pdf]

**Supplemental table 1**

| Activity                                     | Concentration<br>( $\mu$ M) | Control        | Isothiocyanates |                 |                 |
|----------------------------------------------|-----------------------------|----------------|-----------------|-----------------|-----------------|
|                                              |                             |                | Iberin          | Sulforaphane    | Alysin          |
| <b>Mode of cell death</b>                    |                             |                |                 |                 |                 |
| % Apoptotic cells                            | 0                           | 10.7 $\pm$ 1.1 |                 |                 |                 |
|                                              | 20                          |                | 11.3 $\pm$ 2.2  | 12.1 $\pm$ 5.4  | 26.9 $\pm$ 1.4* |
|                                              | 40                          |                | 22.7 $\pm$ 4.9* | 20.2 $\pm$ 0.9* | 32.0 $\pm$ 0.4* |
|                                              | 80                          |                | 41.9 $\pm$ 3.4* | 30.9 $\pm$ 2.1* | 56.7 $\pm$ 5.3* |
| % Necrotic cells                             | 0                           | 0.63 $\pm$ 0.3 |                 |                 |                 |
|                                              | 20                          |                | 0.6 $\pm$ 0.3   | 2.8 $\pm$ 3.7   | 1.3 $\pm$ 0.2   |
|                                              | 40                          |                | 1.5 $\pm$ 0.3   | 1.1 $\pm$ 0.1   | 3.0 $\pm$ 0.4   |
|                                              | 80                          |                | 17.0 $\pm$ 1.7* | 14.3 $\pm$ 3.4* | 22.0 $\pm$ 1.9* |
| <b>Cell phase arrest</b>                     |                             |                |                 |                 |                 |
| % G <sub>1</sub>                             | 0                           | 65.5 $\pm$ 0.4 |                 |                 |                 |
|                                              | 10                          |                | 76.4 $\pm$ 2.1* | 78.9 $\pm$ 0.3* | 75.9 $\pm$ 0.6* |
|                                              | 20                          |                | 49.9 $\pm$ 1.8* | 59.4 $\pm$ 1.2* | 52.1 $\pm$ 0.9* |
|                                              | 40                          |                | 36.7 $\pm$ 1.7* | 32.0 $\pm$ 0.3* | 40.8 $\pm$ 1.4* |
| % S                                          | 0                           | 19.0 $\pm$ 0.3 |                 |                 |                 |
|                                              | 10                          |                | 6.7 $\pm$ 1.0*  | 9.7 $\pm$ 0.2*  | 6.7 $\pm$ 0.4*  |
|                                              | 20                          |                | 6.1 $\pm$ 0.7*  | 8.9 $\pm$ 0.6*  | 6.5 $\pm$ 0.2*  |
|                                              | 40                          |                | 32.6 $\pm$ 1.0* | 21.5 $\pm$ 0.9* | 24.2 $\pm$ 0.6* |
| % G <sub>2</sub> /M                          | 0                           | 15.5 $\pm$ 0.1 |                 |                 |                 |
|                                              | 10                          |                | 16.9 $\pm$ 1.2  | 11.4 $\pm$ 0.3* | 17.2 $\pm$ 0.4  |
|                                              | 20                          |                | 44.0 $\pm$ 2.1* | 31.6 $\pm$ 0.7* | 41.3 $\pm$ 1.0* |
|                                              | 40                          |                | 30.7 $\pm$ 0.9* | 45.8 $\pm$ 1.4* | 35.0 $\pm$ 1.3* |
| <b>Intracellular ROS level (%)</b>           |                             |                |                 |                 |                 |
|                                              | 0                           | 9.8 $\pm$ 2.2  |                 |                 |                 |
|                                              | 10                          |                | 17.7 $\pm$ 2.0* | 18.8 $\pm$ 1.2* | 23.5 $\pm$ 0.3* |
|                                              | 20                          |                | 22.4 $\pm$ 1.0* | 21.8 $\pm$ 1.1* | 24.3 $\pm$ 2.2* |
|                                              | 40                          |                | 25.4 $\pm$ 2.2* | 25.9 $\pm$ 0.7* | 36.1 $\pm$ 3.6* |
| <b>Cell-based tubulin polymerization (%)</b> |                             |                |                 |                 |                 |
|                                              | 0                           | 100 $\pm$ 5.1  |                 |                 |                 |
|                                              | 10                          |                | 74.1 $\pm$ 9.2* | 86.3 $\pm$ 11.3 | 69.5 $\pm$ 4.0* |
|                                              | 20                          |                | 61.1 $\pm$ 7.6* | 69.9 $\pm$ 9.3* | 69.4 $\pm$ 3.3* |
|                                              | 40                          |                | 49.7 $\pm$ 1.6* | 60.1 $\pm$ 1.4* | 53.2 $\pm$ 2.4* |

\*  $p < 0.05$ , significant difference compared to control. All data expressed as means  $\pm$  SD ( $n = 3$ ).
